# Supplementary material
Source: ML conference proceedings conference paper supplement (https://proceedings.neurips.cc/paper_files/paper/2016/hash/452bf208bf901322968557227b8f6efe-Abstract.html)
Supplement: Supplementary file [file 452bf208bf901322968557227b8f6efe-Supplemental.zip]

## A Appendix to Optimistic Gittins Indices

### A.1 Proof of Proposition 3.1

*Proof.* First, letting  $\gamma_n = 1 - 1/n$ , we show that

$$\text{Regret}(\pi^{G, \gamma_n}, n) = O(\log^2(n)). \quad (7)$$

Let  $H \sim \text{Geo}(1/n)$  be an exogenous geometric random variable that is independent of  $\theta$  and not observed by the agent. As an abbreviation, define  $\mu^* = \mathbb{E}_q[\mu^*(\theta)]$ . We then have

$$\begin{aligned} \sum_{t=1}^{\infty} \gamma^{t-1} \mathbb{E}[X_{\pi^{G, \gamma_n}, t}] &= \mathbb{E}\left[\sum_{t=1}^H X_{\pi^{G, \gamma_n}, t}\right] \\ &= \mathbb{E}[H\mu^*(\theta) - \text{Regret}(\pi^{G, \gamma_n}, H)] \end{aligned} \quad (8)$$

$$\begin{aligned} &= n\mu^* - \mathbb{E}[\text{Regret}(\pi^{G, \gamma_n}, H)] \\ &\leq n\mu^* - \mathbb{E}[\text{Regret}(\pi^{G, \gamma_n}, H) \mid H > n] \mathbb{P}(H > n) \\ &\leq n\mu^* - \mathbb{E}[\text{Regret}(\pi^{G, \gamma_n}, n)] (1 - 1/n)^n \\ &= n\mu^* - \mathbb{E}[\text{Regret}(\pi^{G, \gamma_n}, n)] (e^{-1} + o(1)). \end{aligned} \quad (9)$$

Let  $q, Q$  be the density and CDF, respectively, of the prior distribution. Now, by Theorem 3, part 1 of [14], there exists (an efficient) policy  $\tilde{\pi}$ , such that as  $n$  becomes sufficiently large

$$\text{Regret}(\tilde{\pi}, n) \sim \left( A(A-1) \int_{\Theta} q^2(\theta) Q^{A-2}(\theta) d\theta \right) \log^2 n.$$

Therefore for some prior-dependent constant  $C_q$ , we have  $\text{Regret}(\tilde{\pi}, n) \leq C_q \log^2 n$ . Let  $\Delta(\theta)$  denote worst case single period regret under parameter  $\theta$ , that is,  $\Delta(\theta) = \max_i \mu(\theta^*) - \mu(\theta_i)$ . Let  $\Delta$  denote its expectation over  $\theta$ , from which we obtain the lower bound,

$$\mathbb{E}\left[\sum_{t=1}^H X_{\pi^{G, \gamma_n}, t}\right] \geq \mathbb{E}\left[\sum_{t=1}^H X_{\tilde{\pi}, t}\right] \quad (10)$$

$$\begin{aligned} &= \mathbb{E}[H\mu^*(\theta) - \text{Regret}(\tilde{\pi}, H)] \\ &\geq \mathbb{E}[H\mu^*(\theta) - \text{Regret}(\tilde{\pi}, H) \mathbb{1}\{H \geq e\} - 2\mathbb{1}\{H < e\} \Delta(\theta)] \\ &\geq n\mu^* - C_q \mathbb{E}[(\log(H))^2 \mathbb{1}\{H \geq 3\}] - 2\Delta \\ &\geq n\mu^* - C_q \mathbb{E}[(\log(H))^2 \mid H \geq 3] \mathbb{P}(H \geq 3) - 2\Delta \\ &\geq n\mu^* - C_q \log^2(n+3) \mathbb{P}(H \geq 3) - 2\Delta \end{aligned} \quad (11)$$

where (10) holds by optimality of the Gittins Index. The bound (11) follows from the memoryless property of the Geometric distribution, from Jensen's inequality and the fact that function  $\log^2 x$  is a concave function on  $[e, +\infty)$ . Thus, equation (7) is implied by the bounds (9) and (11).

Now, for any policy  $\pi$ , we define  $\tilde{L}_\pi(m) := m\mu^* - \sum_{t=1}^m X_{\pi, t}$  to be the random  $m$  period shortfall against the expected Bayes' optimal arm and let  $g_k = 1 - 1/2^{k-1}$ . We break up the time horizon  $T$

into geometrically growing epochs and bound, conservatively, the Bayes' risk in each one:

$$\text{Regret}(\pi^D, T) \leq \text{Regret}(\pi^D, 2^{\lceil \log_2 T \rceil}) \quad (12)$$

$$\begin{aligned} &= \sum_{k=1}^{\lceil \log_2 T \rceil} \mathbb{E} \left[ \mathbb{E} \left[ \tilde{L}_{\pi^D}(2^{k-1}) \mid \mathcal{F}_{2^{k-1}-1} \right] \right] \\ &= \sum_{k=1}^{\lceil \log_2 T \rceil} \mathbb{E} \left[ \mathbb{E} \left[ \tilde{L}_{\pi^{G, g_k}}(2^{k-1}) \mid \mathcal{F}_{2^{k-1}-1} \right] \right] \\ &\leq \sum_{k=1}^{\lceil \log_2 T \rceil} \mathbb{E} \left[ \mathbb{E} \left[ \tilde{L}_{\pi^{G, g_k}}(2^{k-1}) \mid \mathcal{F}_0 \right] \right] \end{aligned} \quad (13)$$

$$\begin{aligned} &= \sum_{k=1}^{\lceil \log_2 T \rceil} \text{Regret}(\pi^{G, g_k}, 2^{k-1}) = O \left( \sum_{k=1}^{\lceil \log_2 T \rceil} k^2 \right) \\ &= O(\log^3 T) \end{aligned} \quad (14)$$

where (14) follows from equation (7) and (13) holds because regret increases if history is discarded.  $\square$

## A.2 Proof of Lemma 3.2

*Proof.* Fix  $\lambda > 0$  and an arm  $i$ . Let  $V_\lambda(y)$  be the value of the RHS of (2) with the per-period reward of  $\lambda$ , and define  $\hat{V}_\lambda^K(y)$ , similarly, for problem (3) (where  $y$  is, as before, the state of an arm). Notice that because rewards are generated according to an unknown parameter  $\theta_i$ , which needs to be learned, that if we condition on a fixed  $\theta_i$ , we have for any stopping time  $\tau$  that

$$\mathbb{E} \left[ \sum_{t=1}^{\tau-1} \gamma^{t-1} X_{i,t} + \gamma^{\tau-1} \frac{\lambda}{1-\gamma} \mid \theta_i \right] \leq \mathbb{E} \left[ \sum_{t=1}^{\tau-1} \gamma^{t-1} \mu(\theta_i) + \gamma^{\tau-1} \frac{\lambda}{1-\gamma} \mid \theta_i \right] \quad (15)$$

where the expectation is also taken over the agent's prior on  $\theta_i$ . Simply put, the best performance in the bandit game can be achieved if the parameter governing expected rewards is known from the beginning by the agent. Now recall that  $R(y_{i,t})$  is a random variable drawn from the prior on the arm's mean reward at time  $t$ . We also define the function

$$r_{\lambda, K}(t, x) = \begin{cases} \lambda & t < K \\ \max(x, \lambda) & \text{otherwise} \end{cases}$$

Let  $\tau$  be the stopping time at which the agent retires and define  $\tau_K = \tau \wedge (K + 1)$ . We then bound  $V_\lambda(y)$ ,

$$\begin{aligned}
V_\lambda(y) &= \sup_{\tau > 1} \mathbb{E} \left[ \sum_{t=1}^{\tau-1} \gamma^{t-1} X_{i,t} + \gamma^{\tau-1} \frac{\lambda}{1-\gamma} \middle| y_{i,1} = y \right] \\
&= \sup_{\tau > 1} \mathbb{E} \left[ \mathbb{E} \left[ \sum_{t=1}^{\tau-1} \gamma^{t-1} X_{i,t} + \gamma^{\tau-1} \frac{\lambda}{1-\gamma} \middle| \theta_i \right] \middle| y_{i,1} = y \right] \\
&= \sup_{\tau > 1} \mathbb{E} \left[ \sum_{t=1}^{\tau_K-1} \gamma^{t-1} X_{i,t} + \mathbb{E} \left[ \sum_{t=\tau_K}^{\tau-1} \gamma^{t-1} X_{i,t} + \gamma^{\tau-1} \frac{\lambda}{1-\gamma} \middle| \theta_i \right] \middle| y_{i,1} = y \right] \\
&\leq \sup_{\tau > 1} \mathbb{E} \left[ \sum_{t=1}^{\tau_K-1} \gamma^{t-1} X_{i,t} + \mathbb{E} \left[ \sum_{t=\tau_K}^{\tau-1} \gamma^{t-1} \mu(\theta_i) + \gamma^{\tau-1} \frac{\lambda}{1-\gamma} \middle| \theta_i \right] \middle| y_{i,1} = y \right] \quad (16) \\
&= \sup_{\tau > 1} \mathbb{E} \left[ \sum_{t=1}^{\tau_K-1} \gamma^{t-1} X_{i,t} + \mathbb{E} \left[ \gamma^{\tau_K-1} \frac{r_{\lambda,K}(\tau_K, \mu(\theta_i))}{1-\gamma} \middle| \theta_i \right] \middle| y_{i,1} = y \right] \\
&= \sup_{\tau > 1} \mathbb{E} \left[ \sum_{t=1}^{\tau_K-1} \gamma^{t-1} X_{i,t} + \frac{\gamma^{\tau_K-1}}{1-\gamma} \mathbb{E} [\mathbb{E} [r_{\lambda,K}(\tau_K, \mu(\theta_i)) \mid \theta_i] \mid \mathcal{F}_{\tau_K-1}] \right] \\
&= \sup_{\tau > 1} \mathbb{E} \left[ \sum_{t=1}^{\tau_K-1} \gamma^{t-1} X_{i,t} + \frac{\gamma^{\tau_K-1}}{1-\gamma} \underbrace{\mathbb{E} [r_{\lambda,K}(\tau_K, R(y_{i,\tau_K}))]}_{=R_{\lambda,K}(\tau_K, y_{i,\tau_K})} \middle| y_{i,1} = y \right] \\
&= \sup_{1 < \tau \leq K+1} \mathbb{E} \left[ \sum_{t=1}^{\tau} \gamma^{t-1} X_{i,t} + \gamma^{\tau-1} \frac{R_{\lambda,K}(\tau, y_{i,\tau})}{1-\gamma} \middle| y_{i,1} = y \right] = \hat{V}_\lambda^K(y).
\end{aligned}$$

The main step in the above is (16) where we bound on the inner conditional expectation (in terms of  $\theta_i$ ) by applying (15). We also used the fact that  $\mu(\theta_i) \mid \mathcal{F}_{t-1} \sim R(y_{i,t})$  for all  $t$ . Finally observe that both  $\hat{V}_\lambda^K(y)$  and  $V_\lambda(y)$  are increasing in  $\lambda$  for any fixed  $y$ . Therefore if  $\lambda_1 = (1-\gamma)\hat{V}_{\lambda_1}^K(y)$  and  $\lambda_2 = (1-\gamma)V_{\lambda_2}(y)$ , then, because  $V_\lambda(y) \leq \hat{V}_\lambda^K(y)$  for any  $\lambda$ , it must be that  $\lambda_1 \geq \lambda_2$ . A simple argument shows this, which we omit.  $\square$

### A.3 Results for the frequentist regret bound proof

#### A.3.1 Definitions and properties of Binomial distributions

We list notation and facts related to Beta and Binomial distributions, which are used through this section.

**Definition A.1.**  $F_{n,p}^B(\cdot)$  is the CDF of the Binomial distribution with parameters  $n$  and  $p$ , and  $F_{a,b}^\beta(\cdot)$  is the CDF of the Beta distribution with parameters  $a$  and  $b$ .

**Fact A.1.** Let  $a$  and  $b$  be positive integers and  $y \in [0, 1]$ ,

$$F_{a,b}^\beta(y) = 1 - F_{a+b-1,y}^B(a-1)$$

*Proof.* Proof is found in [2].  $\square$

**Fact A.2.** The median of a Binomial( $n, p$ ) distribution is either  $\lceil np \rceil$  or  $\lfloor np \rfloor$ .

*Proof.* Proof is found in [11].  $\square$

**Corollary A.1** (Corollary of Fact A.2). Let  $n$  be a positive integer and  $p \in (0, 1)$ . For any nonnegative integer  $s < np$

$$F_{n,p}(s) \leq 1/2$$

**Fact A.3.** Let  $n$  be a positive integer and  $p \in [0, 1]$ . Then for any  $k \in \{0, \dots, n\}$ ,

$$(1-p)F_{n-1,p}(k) \leq F_{n,p}(k) \leq F_{n-1,p}^B(k)$$

*Proof.* To prove  $F_{n,p}(k) \leq F_{n-1,p}^B(k)$ , we let  $X_1, \dots, X_n$  be i.i.d samples from a Bernoulli( $p$ ) distribution. We then have

$$F_{n,p}^B(k) = \mathbb{P}\left(\sum_{i=1}^n X_i \leq k\right) \leq \mathbb{P}\left(\sum_{i=1}^{n-1} X_i \leq k\right) = F_{n-1,p}^B(k)$$

Now to prove  $(1-p)F_{n-1,p}(k) \leq F_{n,p}(k)$ , it's enough to observe that  $F_{n,p}(k) = pF_{n-1,p}(k-1) + (1-p)F_{n-1,p}(k)$ .  $\square$

### A.3.2 Ratio of Binomial CDFs

**Lemma A.1.** *Let  $0 < q < p < 1$ . Let  $n$  be a positive integer such that  $e^{\frac{n}{2}d(q,p)} \geq (n+1)^4$  and let  $k$  be a nonnegative integer such that  $k < nq$ . It then follows that*

$$F_{n,q}^B(k)/F_{n,p}^B(k) > e^{\frac{n}{2}d(q,p)}.$$

*Proof.* From the method of types (see [8]), we have for any  $r \in (0, 1)$  and  $j < nr$

$$\frac{e^{-nd(j/n,r)}}{(1+n)^2} \leq F_{n,r}(j) \leq (n+1)^2 e^{-nd(j/n,r)}. \quad (17)$$

Because  $k < nq < np$ , by applying (17) to both the numerator and denominator, we get

$$\frac{F_{n,q}(k)}{F_{n,p}(k)} \geq \frac{e^{-nd(k/n,q)}}{(n+1)^4 e^{-nd(k/n,p)}} = \frac{e^{n(d(k/n,p)-d(k/n,q))}}{(n+1)^4}.$$

Examining the exponent, we find

$$\begin{aligned} d(k/n,p) - d(k/n,q) &= \frac{k}{n} \log \frac{q}{p} + \left(1 - \frac{k}{n}\right) \log \frac{1-q}{1-p} \\ &> q \log \frac{q}{p} + (1-q) \log \frac{1-q}{1-p} \\ &= d(q,p) \end{aligned}$$

where the bound holds because the expression is decreasing in  $k$ , and  $k < nq$ . Therefore,

$$\frac{F_{n,q}(k)}{F_{n,p}(k)} > \frac{e^{nd(q,p)}}{(n+1)^4} = \frac{e^{\frac{n}{2}d(q,p)}}{(n+1)^4} e^{\frac{n}{2}d(q,p)} \geq e^{\frac{n}{2}d(q,p)}. \quad (18)$$

The final lower bound in (18) follows from the assumption on  $n$ .  $\square$

### A.3.3 Optimistic Gittins Index results

**Lemma A.2.** *Let  $\gamma \in (0, 1)$  and*

$$\lambda = \sup\{x \in [0, 1] : \mathbb{E}[V] + \gamma \mathbb{E}[(x - V)^+] \geq x\} \quad (19)$$

*where  $V$  is a continuous random variable with support  $[0, 1]$  and  $\mathbb{E}[V] > 0$ . For all  $y \in (0, 1)$ , the following equivalence holds*

$$\lambda < y \iff \mathbb{E}[V] + \gamma \mathbb{E}[(y - V)^+] < y. \quad (20)$$

*Proof.* As a shorthand let  $g(z) = \mathbb{E}[V] + \gamma \mathbb{E}[(z - V)^+]$ . First let's assume  $\lambda < y$ . If  $y \leq g(y)$ , then  $\lambda$  would not be the supremum over all real numbers  $z \in [0, 1]$  such that  $z \leq g(z)$ . Therefore  $g(y) < y$ .

For the converse, assume  $\lambda \geq y$ . Observe that  $g(z)$  is convex. Also, one can verify through the bounded convergence theorem that  $g(z)$  is differentiable [the event  $\{V = z\}$ , at which  $(z - V)^+$  is not differentiable, has measure zero]. Thirdly, because  $g(\cdot)$  is continuous on  $[0, 1]$ , by the Intermediate Value Theorem, it has a fixed point and in particular  $\lambda = g(\lambda)$ . Therefore let  $\epsilon < (1 - \lambda)/2$  and from the first direction of the proof, we have  $\lambda + \epsilon > g(\lambda + \epsilon)$ . Thus

$$g(\lambda + \epsilon) \geq g(\lambda) + \epsilon g'(\lambda) = \lambda + \epsilon g'(\lambda)$$

where the inequality follows from  $g(\cdot)$  being convex and differentiable. This implies that  $g'(\lambda) < 1$  and, moreover, because  $g(z)$  is also increasing, it follows that  $g'(\lambda) \in (0, 1)$ , whence

$$\begin{aligned} g(y) &\geq g(\lambda) - (\lambda - y)g'(\lambda) \\ &= \lambda - (\lambda - y)g'(\lambda) \\ &= (1 - g'(\lambda))\lambda + g'(\lambda)y \\ &\geq \min(y, \lambda) = y. \end{aligned}$$

□

**Corollary A.2.** *Let  $v_{i,t}$  be the approximate Optimistic Gittins Index, under the Bernoulli problem with uniform priors, of arm  $i$  at time  $t$  and let  $x \in (0, 1)$ . The following equivalence holds*

$$\{v_{i,t} < x\} = \{\mathbb{E}[V_t] + \gamma_t \mathbb{E}[(x - V_t)^+] < x\}$$

where  $V_t \sim \text{Beta}(s_t + 1, j_t - s_t + 1)$ ,  $j_t$  denotes the number of pulls of arm  $i$  and  $s_t$  the number of successes observed.

*Proof.* By the definition in Equation (4),  $v_{i,t}$  can be characterized with the relation

$$v_{i,t} = \sup \{u \in [0, 1] : u \leq \mathbb{E}[V_t] + \gamma_t \mathbb{E}[(u - V_t)^+]\}.$$

The conclusion then follows from Lemma A.2. □

#### A.4 Proof of Lemma 4.1

*Proof.* Define  $\delta := (\theta_1 - \eta)/2$  and  $\eta' := \eta + \delta$ . In other words,  $\delta$  is half the distance between  $\eta$  and  $\theta_1$ ;  $\eta'$  is the point half-way. The proof consists of showing two claims

**Claim 1:**  $\{v_{1,t} < \eta\} \subseteq \{F_{j_t+1,\eta'}^B(s_t) < \frac{1}{\delta t}\}$ :

Let  $V_t \sim \text{Beta}(s_t + 1, j_t - s_t + 1)$  be the agent's posterior on the optimal arm. Using Corollary A.2, we find that

$$\begin{aligned} \{v_{1,t} < \eta\} &= \{\mathbb{E}[V_t] + \gamma_t \mathbb{E}[(\eta - V_t)^+] < \eta\} \\ &= \left\{ \mathbb{E}[(V_t - \eta)^+] < \frac{1}{t} \right\} \end{aligned} \tag{21}$$

where the second equality is obtained from rearranging terms. We approximate the conditional expectation in (21) with

$$\begin{aligned} \mathbb{E}[(V_t - \eta)^+ \mid s_t, j_t] &= \mathbb{E}[(V_t - \eta) \mathbb{1}\{V_t \geq \eta\}] \\ &= \mathbb{E}[(V_t - \eta) \mathbb{1}\{\eta + \delta > V_t \geq \eta\}] \\ &\quad + \mathbb{E}[(V_t - \eta) \mathbb{1}\{V_t \geq \eta + \delta\}] \\ &> \mathbb{E}[(V_t - \eta) \mathbb{1}\{V_t \geq \eta + \delta\}] \\ &\geq \delta \mathbb{P}(V_t \geq \eta') \\ &= \delta(1 - F_{s_t+1, j_t-s_t+1}(\eta')) = \delta F_{j_t+1, \eta'}^B(s_t) \end{aligned} \tag{22}$$

The last equality is due to Fact A.1 and this proves the claim.

**Claim 2:**  $\sum_{t=1}^{\infty} \mathbb{P}(F_{j_t+1,\eta'}^B(s_t) < \frac{1}{\delta t}) \leq C_1$  where  $C_1$  is a constant:

Let us fix the sequence  $f_t = -\frac{\log \delta t}{\log(1-\eta')} - 1 = O(\log t)$ . We then have

$$\begin{aligned} \mathbb{P}\left(F_{j_t+1,\eta'}^B(s_t) < \frac{1}{\delta t}\right) &= \mathbb{P}\left(F_{j_t+1,\eta'}^B(s_t) < \frac{1}{\delta t}, j_t > f_t\right) \\ &\quad + \mathbb{P}\left(F_{j_t+1,\eta'}^B(s_t) < \frac{1}{\delta t}, j_t \leq f_t\right). \end{aligned} \tag{23}$$

For the second term in the RHS of (23) we have the following bound,

$$\begin{aligned}
\mathbb{P}\left(F_{j_t+1,\eta'}^B(s_t) < \frac{1}{\delta t}, j_t \leq f_t\right) &\leq \mathbb{P}\left(F_{j_t+1,\eta'}^B(0) < \frac{1}{\delta t}, j_t \leq f_t\right) \\
&= \mathbb{P}\left((1-\eta')^{j_t+1} < \frac{1}{\delta t}, j_t \leq f_t\right) \\
&\leq \mathbb{P}\left((1-\eta')^{f_t+1} < \frac{1}{\delta t}\right) = 0.
\end{aligned} \tag{24}$$

Now we use the following fact to bound the left term on the RHS of (23). Define the function

$$F_{n,p}^{-B}(u) := \inf\{x : F_{n,p}^B(x) \geq u\}$$

which is the inverse CDF. Then it is known that if  $U \sim \text{Unif}(0, 1)$ , then  $F_{n,p}^{-B}(U) \sim \text{Binomial}(n, p)$ . Furthermore,  $F_{n,p}^B(F_{n,p}^{-B}(U)) \geq U$  due to the definition of the inverse CDF.

Now let us only consider large  $t$ , in particular  $t > M = M(\theta_1, \eta')$  where:

1.  $M$  is such that  $e^{d(\eta', \theta_1)f_M/2} > (f_M + 1)^4$
2.  $M > \frac{4}{(1-\eta')\delta}$
3.  $\lceil f_M \rceil > 0$  and  $F_{\lceil f_M \rceil, \eta'}^B(f_M \eta') > 1/4$ . Note that there is a large enough integer for this because  $F_{\lceil f_t \rceil, \eta'}^B(f_t \eta') \rightarrow \frac{1}{2}$  as  $t \rightarrow \infty$ .

Suppose that  $t > M$ . It then follows that the event  $\{F_{j_t, \eta'}^B(s_t) < \frac{1}{(1-\eta')\delta t}, s_t \geq j_t \eta', j_t > f_t\}$  has measure zero because of the assumptions made on  $M$ . Therefore if  $t > M$ , we have

$$\begin{aligned}
\mathbb{P}\left(F_{j_t+1,\eta'}^B(s_t) < \frac{1}{\delta t}, j_t > f_t\right) \\
\leq \mathbb{P}\left(F_{j_t,\eta'}^B(s_t) < \frac{1}{(1-\eta')\delta t}, j_t > f_t\right)
\end{aligned} \tag{25}$$

$$\begin{aligned}
&= \mathbb{P}\left(F_{j_t,\eta'}^B(s_t) < \frac{1}{(1-\eta')\delta t}, s_t < j_t \eta', j_t > f_t\right) \\
&= \mathbb{P}\left(F_{j_t,\theta_1}^B(s_t) \frac{F_{j_t,\eta'}^B(s_t)}{F_{j_t,\theta_1}^B(s_t)} < \frac{1}{(1-\eta')\delta t}, s_t < j_t \eta', j_t > f_t\right) \\
&\leq \mathbb{P}\left(F_{j_t,\theta_1}^B(s_t) e^{j_t D} < \frac{1}{(1-\eta')\delta t}, j_t > f_t\right)
\end{aligned} \tag{26}$$

$$\begin{aligned}
&\leq \mathbb{P}\left(F_{j_t,\theta_1}^B(s_t) e^{f_t D} < \frac{1}{(1-\eta')\delta t}\right) \\
&= \mathbb{P}\left(F_{j_t,\theta_1}^B(F_{j_t,\theta_1}^{-B}(U)) < \frac{e^{-f_t D}}{(1-\eta')\delta t}\right)
\end{aligned} \tag{27}$$

$$\begin{aligned}
&\leq \mathbb{P}\left(U < \frac{e^{-f_t D}}{(1-\eta')\delta t}\right) \\
&= \frac{e^{-f_t D}}{(1-\eta')\delta t} \\
&= O\left(\frac{1}{t^{1+Dc_{\eta'}}}\right)
\end{aligned} \tag{28}$$

where  $D = d(\eta', \theta_1) > 0$  and  $c_{\eta'} = -\log^{-1}(1-\eta') > 0$  are constant. The bound (25) holds due to Fact (A.3). Bound (26) follows from an application of Lemma A.1 and the fact that  $t > M$ . Equation (27) follows from  $s_t \sim \text{Binomial}(j_t, \theta_1)$  and the inverse sampling technique. By combining bounds

(28), (24) and (23), we get

$$\sum_{t=1}^{\infty} \mathbb{P} \left( F_{j_t+1, \eta'}^B(s_t) < \frac{1}{\delta t} \right) \leq M + \sum_{t=M+1}^{\infty} \mathbb{P} \left( F_{j_t+1, \eta'}^B(s_t) < \frac{1}{\delta t} \right) \leq M + C'_1 =: C_1$$

where  $C'_1 = C'_1(\theta_1, \eta')$  is some other constant, namely the limit of the series.  $\square$

### A.5 Proof of Lemma 4.2

*Proof.* See the main proof of Theorem 1 to recall the definition of constants  $\eta_1$ ,  $\eta_3$  and their relationship with  $\theta_2$  and  $\theta_1$ . As an abbreviation we let  $L = L(T)$ .

Firstly, by the law of total probability, we find that

$$\begin{aligned} \sum_{t=1}^T \mathbb{P}(v_{2,t} \geq \eta_3, k_t \geq L, \pi_t^{\text{OG}} = 2) \\ &= \sum_{t=1}^T \mathbb{P}(v_{2,t} \geq \eta_3, k_t \geq L, s'_t < \lfloor k_t \eta_1 \rfloor, \pi_t^{\text{OG}} = 2) \\ &\quad + \sum_{t=1}^T \mathbb{P}(v_{2,t} \geq \eta_3, k_t \geq L, s'_t \geq \lfloor k_t \eta_1 \rfloor, \pi_t^{\text{OG}} = 2) \\ &\leq \sum_{t=1}^T \mathbb{P}(v_{2,t} \geq \eta_3, k_t \geq L, s'_t < \lfloor k_t \eta_1 \rfloor) + \sum_{t=1}^T \mathbb{P}(\pi_t^{\text{OG}} = 2, s'_t \geq \lfloor k_t \eta_1 \rfloor) \end{aligned} \quad (29)$$

Let  $V_t \sim \text{Beta}(s'_t + 1, k_t - s'_t + 1)$  denote the agent's posterior on the second arm at time  $t$ , then

$$\begin{aligned} \sum_{t=1}^T \mathbb{P}(v_{2,t} \geq \eta_3, k_t \geq L, s'_t < \lfloor k_t \eta_1 \rfloor) \\ &= \sum_{t=1}^T \mathbb{P}(\mathbb{E}[V_t] + \gamma_t \mathbb{E}[(\eta_3 - V_t)^+] \geq \eta_3, k_t \geq L, s'_t < \lfloor k_t \eta_1 \rfloor) \\ &= \sum_{t=1}^T \mathbb{P}\left(\frac{\mathbb{E}[(\eta_3 - V_t)^+]}{\mathbb{E}[(V_t - \eta_3)^+]} \leq t, k_t \geq L, s'_t < \lfloor k_t \eta_1 \rfloor\right) \end{aligned} \quad (30)$$

where the second equality follows from Corollary A.2 in Appendix A.3.3. The following result lets us bound (30),

**Lemma A.3.** *Let  $0 < x < y < 1$ . For any nonnegative integers  $s$  and  $k$  with  $s < \lfloor kx \rfloor$ , it holds that*

$$\frac{\mathbb{E}[(y - V)^+]}{\mathbb{E}[(V - y)^+]} \geq \frac{(y - x) \exp(kd(x, y))}{2}$$

where  $V \sim \text{Beta}(s + 1, k - s + 1)$ .

*Proof.* See Appendix A.5.1.  $\square$

Therefore, from equation (30) and Lemma A.3, we find that whenever  $T > \left(\frac{2}{\eta_3 - \eta_1}\right)^{1/\epsilon} =: T^*(\epsilon, \theta)$ ,

$$\begin{aligned}
& \sum_{t=1}^T \mathbb{P}(v_{2,t} \geq \eta_3, k_t \geq L, s'_t < \lfloor k_t \eta_1 \rfloor) \\
& \leq \sum_{t=1}^T \mathbb{P}((\eta_3 - \eta_1) \exp\{k_t d(\eta_1, \eta_3)\} \leq 2t, k_t \geq L) \\
& \leq \sum_{t=1}^T \mathbb{P}((\eta_3 - \eta_1) \exp\{Ld(\eta_1, \eta_3)\} \leq 2t) \\
& = \sum_{t=1}^T \mathbb{P}((\eta_3 - \eta_1) T^{1+\epsilon} \leq 2t) = 0
\end{aligned} \tag{31}$$

All that is left is to bound the second term in (29), and to do so we apply the following Lemma whose proof is in Appendix A.5.2

**Lemma A.4.** *There exist positive constants  $C = C(\theta_2, \eta_1)$  and  $x' > \theta_2$  such that*

$$\sum_{t=1}^T \mathbb{P}(s'_t \geq \lfloor k_t \eta_1 \rfloor, \pi_t^{\text{OG}} = 2) \leq K + \frac{1}{1 - e^{-d(x', \theta_2)}}$$

Combining Lemma A.4, (31), (29) and (30) shows the claim.  $\square$

### A.5.1 Proof of Lemma A.3

*Proof.* We upper bound the denominator as follows. Given that  $s < \lfloor kx \rfloor$ , we have  $s \leq kx - 1$ . Let  $B(a, b)$  denote the Beta function, then

$$\begin{aligned}
\mathbb{E}[(V - y)^+] &= \frac{1}{B(s+1, k-s+1)} \int_y^1 (t-y)t^s(1-t)^{k-s} dt \\
&= \frac{1}{B(s+1, k-s+1)} \int_y^1 t^{s+1}(1-t)^{k-s} dt - y\mathbb{P}(V \geq y) \\
&= \frac{B(s+2, k-s+1)}{B(s+1, k-s+1)} \left( \frac{1}{B(s+2, k-s+1)} \right) \int_y^1 t^{s+1}(1-t)^{k-s} dt - y\mathbb{P}(V \geq y) \\
&= \frac{s+1}{k+2} F_{k+2,y}^B(s+1) - y\mathbb{P}(V \geq y)
\end{aligned} \tag{32}$$

$$\leq \frac{s+1}{k+2} F_{k+2,y}^B(s+1) \leq F_{k,y}^B(kx) \leq \exp\{-kd(x, y)\} \tag{33}$$

where we use Fact A.1 and the definition of the Beta CDF to establish equation (32). The final bound in (33) is the result of the Chernoff-Hoeffding theorem and Fact A.3. Let  $\delta := y - x$ , and note that  $s < kx \implies s \leq \lfloor (k+1)x \rfloor$  due to  $s$  being integer, whence

$$\begin{aligned}
\mathbb{E}[(y - V)^+] &= \mathbb{E}[(y - V)\mathbb{1}\{V \leq y\} \mid s, k] \\
&= \mathbb{E}[(y - V)\mathbb{1}\{y - \delta \leq V \leq y\} \mid s, k] + \mathbb{E}[(y - V)\mathbb{1}\{V < y - \delta\} \mid s, k] \\
&> \mathbb{E}[(y - V)\mathbb{1}\{V < y - \delta\} \mid s, k] \\
&\geq \delta \mathbb{E}[\mathbb{1}\{V < y - \delta\} \mid s, k]
\end{aligned} \tag{34}$$

$$\begin{aligned}
&= \delta \mathbb{P}(V < x \mid s) \\
&= \delta (1 - F_{k+1,x}^B(s))
\end{aligned} \tag{35}$$

$$\geq \delta/2 \tag{36}$$

where equation (35) relies on Fact A.1. The bound (36) is justified from Fact A.2 and  $s \leq \lfloor (k+1)x \rfloor$ . Thus using the inequalities for both the numerator and denominator, we obtain the desired bound.  $\square$



### A.5.2 Proof of Lemma A.4

*Proof.* The steps in this proof follow a similar one in [3] but we show them for completeness. We bound the number of times the suboptimal arm's mean is overestimated. Let  $\tau_\ell$  be the time step in which the suboptimal arm is sampled for the  $\ell^{\text{th}}$  time. Because for any  $x$ ,  $\lim_{n \rightarrow \infty} \frac{\lfloor nx \rfloor}{nx} = 1$ , we can let  $N$  be a large enough integer so that if  $\ell \geq N$ , then  $\eta_1 \frac{\lfloor \ell \eta_1 \rfloor}{\ell \eta_1} > x' := (\theta_2 + \eta_1)/2 > \theta_2$ . In that case,

$$\begin{aligned}
\sum_{t=1}^T \mathbb{P}(s'_t \geq \lfloor k_t \eta_1 \rfloor, \pi_t^{\text{OG}} = 2) &\leq \mathbb{E} \left[ \sum_{\ell=1}^T \sum_{t=\tau_\ell}^{\tau_{\ell+1}-1} \mathbb{1}\{s'_\ell \geq \lfloor k_\ell \eta_1 \rfloor\} \mathbb{1}\{\pi_t^{\text{OG}} = 2\} \right] \\
&= \mathbb{E} \left[ \sum_{\ell=1}^T \mathbb{1}\{s'_{\tau_\ell} \geq \lfloor (\ell-1) \eta_1 \rfloor\} \sum_{t=\tau_\ell}^{\tau_{\ell+1}-1} \mathbb{1}\{\pi_t^{\text{OG}} = 2\} \right] \\
&= \mathbb{E} \left[ \sum_{\ell=0}^{T-1} \mathbb{1}\{s'_{\tau_{\ell+1}} \geq \lfloor \ell \eta_1 \rfloor\} \right] \\
&\leq N + \sum_{\ell=N+1}^{T-1} \mathbb{P} \left( s'_{\tau_{\ell+1}} \geq \ell \eta_1 \frac{\lfloor \ell \eta_1 \rfloor}{\ell \eta_1} \right) \\
&\leq N + \sum_{\ell=N+1}^{T-1} \mathbb{P} \left( s'_{\tau_{\ell+1}} \geq \ell x' \right) \\
&\leq N + \sum_{\ell=1}^{\infty} \exp(-\ell d(x', \theta_2)) \\
&= N + \frac{1}{1 - e^{-d(x', \theta_2)}}
\end{aligned} \tag{37}$$

□

The bound (37) follows from the Chernoff-Hoeffding theorem and that  $s'_{\tau_{\ell+1}} \sim \text{Binomial}(k_{\ell+1}, \theta_2) \sim \text{Binomial}(\ell, \theta_2)$ .

### A.6 Additional plots

We include some additional plots that compare Bayes UCB and Thompson Sampling in addition to IDS.

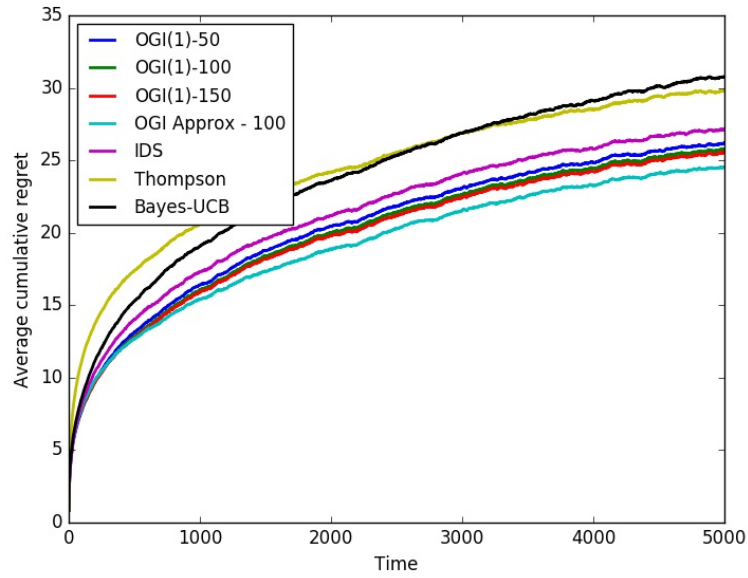

Figure 2: Mean regret in the long horizon Gaussian experiment of section 5.

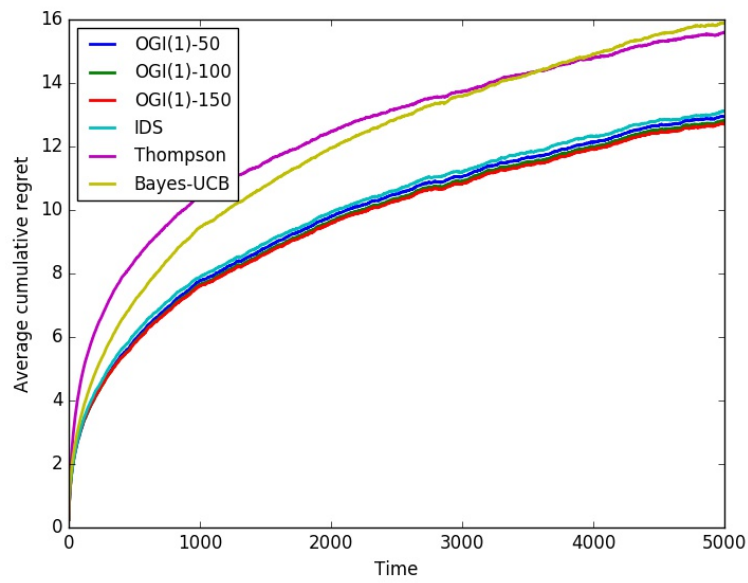

Figure 3: Mean regret in the corresponding Bernoulli experiment.
